# Supplementary material for: Cell penetrating peptides: a comparative transport analysis for 474 sequence motifs
Source: PubMed Central journal article supplement (PMC6058608; doi:10.1080/10717544.2018.1458921), 2018-04-14
Supplement: IDRD_A_1458921_SM6422.pdf [file IDRD_A_1458921_SM6422.pdf]

## Supplementary Material for

### Cell penetrating peptides: a comparative transport analysis for 474 sequence motifs

Katrin Ramaker, Maik Henkel, Thorsten Krause, Niels Röckendorf and Andreas Frey.

*Division of Mucosal Immunology and Diagnostics, Priority Area Asthma & Allergy, Research Center Borstel, Airway Research Center North (ARCN), Member of the German Center for Lung Research (DZL), Parkallee 22, 23845 Borstel, Germany.*

#### Supplementary Table TS1

Peptides synthesized and tested for their uptake efficiency in live HeLa cells. Net charge and hydrophathy score are calculated according to Supplementary Formulae F1 and F2 (see below).

| No. | Sequence | RFU 1  | RFU 2 | Mean RFU | Net charge pH 7.4 | Hydrophathy score |
|-----|----------|--------|-------|----------|-------------------|-------------------|
| 1   | YRFK     | 1.82   | 1.82  | 1.82     | 2                 | 1.2               |
| 2   | RRRRR    | 7.53   | 7.19  | 7.36     | 5                 | 15.0              |
| 3   | VPMLK    | 1.96   | 2.15  | 2.05     | 1                 | -1.6              |
| 4   | VPTLK    | -0.25  | -1.17 | -0.71    | 1                 | -0.7              |
| 5   | VPALR    | 3.43   | 3.52  | 3.48     | 1                 | -0.8              |
| 6   | VSALK    | 2.70   | 0.05  | 1.38     | 1                 | -0.5              |
| 7   | PMLKE    | 15.12  | 11.44 | 13.28    | 0                 | 2.9               |
| 8   | VPALK    | 4.91   | 3.92  | 4.42     | 1                 | -0.8              |
| 9   | VSLKK    | 1.81   | 0.98  | 1.39     | 2                 | 3.0               |
| 10  | VSGKK    | 2.56   | 4.61  | 3.59     | 2                 | 4.8               |
| 11  | KLPVM    | 2.32   | 1.17  | 1.74     | 1                 | -1.6              |
| 12  | IPMIK    | 4.80   | 3.80  | 4.30     | 1                 | -1.9              |
| 13  | KLGVN    | 12.94  | 14.48 | 13.71    | 1                 | -1.6              |
| 14  | KLPVT    | 14.21  | 4.83  | 9.52     | 1                 | -0.7              |
| 15  | VPMIK    | 18.74  | 22.01 | 20.37    | 1                 | -1.6              |
| 16  | IPALK    | 4.88   | 3.68  | 4.28     | 1                 | -1.1              |
| 17  | IPMLK    | 23.55  | 6.85  | 15.20    | 1                 | -1.9              |
| 18  | VPTLQ    | 4.68   | 5.23  | 4.96     | 0                 | -3.5              |
| 19  | QLPVM    | 12.28  | 8.44  | 10.36    | 0                 | -4.4              |
| 20  | ELPVM    | 2.84   | 8.17  | 5.51     | -1                | -1.6              |
| 21  | VPTLE    | 2.11   | 1.70  | 1.91     | -1                | -0.7              |
| 22  | EEEEAA   | 0.97   | 5.16  | 3.06     | -3                | 8.0               |
| 23  | IGCRH    | 11.86  | 7.14  | 9.50     | 2                 | -0.3              |
| 24  | CWKKK    | 26.80  | 29.48 | 28.14    | 3                 | 4.6               |
| 25  | RRRRRR   | 21.47  | 9.55  | 15.51    | 6                 | 18.0              |
| 26  | MIIYRD   | 9.88   | 13.71 | 11.80    | 0                 | -1.2              |
| 27  | FIRIGC   | 100.65 | 61.22 | 80.93    | 1                 | -4.1              |
| 28  | PFVYLI   | 29.44  | 25.15 | 27.29    | 0                 | -9.9              |
| 29  | RIFIGC   | 51.00  | 49.94 | 50.47    | 1                 | -4.1              |
| 30  | RRRRRRR  | 41.18  | 41.42 | 41.30    | 7                 | 21.0              |
| 31  | RRMKWKK  | 76.20  | 17.32 | 46.76    | 5                 | 10.3              |
| 32  | PKKKRKV  | 14.66  | 15.49 | 15.08    | 5                 | 13.5              |
| 33  | FKKFRKF  | 16.50  | 9.51  | 13.00    | 4                 | 4.5               |

| No. | Sequence    | RFU 1  | RFU 2 | Mean RFU | Net charge pH 7.4 | Hydrophathy score |
|-----|-------------|--------|-------|----------|-------------------|-------------------|
| 34  | MI IYRDL    | 14.51  | 13.46 | 13.99    | 0                 | -3.0              |
| 35  | RKKRRQRR    | 32.43  | 19.51 | 25.97    | 7                 | 21.2              |
| 36  | RRRRRRRR    | 106.67 | 84.97 | 95.82    | 8                 | 24.0              |
| 37  | NRRMKWKK    | 17.42  | 11.25 | 14.33    | 5                 | 10.5              |
| 38  | RRRRRRRW    | 83.21  | 64.01 | 73.61    | 7                 | 17.6              |
| 39  | EEEEAKKK    | 19.06  | 4.20  | 11.63    | 0                 | 17.0              |
| 40  | GRKRKKRT    | 12.77  | 9.56  | 11.17    | 6                 | 17.6              |
| 41  | RNRSRHRR    | 8.22   | 4.91  | 6.57     | 6                 | 15.0              |
| 42  | MI IYRDLI   | 30.46  | 24.76 | 27.61    | 0                 | -4.8              |
| 43  | IYRDLISH    | 7.75   | 15.37 | 11.56    | 1                 | -1.9              |
| 44  | WRFKWRFK    | 91.52  | 88.32 | 89.92    | 4                 | 0.2               |
| 45  | KERKKRRR    | 15.92  | 21.93 | 18.93    | 6                 | 24.0              |
| 46  | RIFIRIGC    | 29.72  | 23.09 | 26.41    | 2                 | -2.9              |
| 47  | RKKRRQRRR   | 103.80 | 41.13 | 72.47    | 8                 | 24.2              |
| 48  | RRRQRKRR    | 51.88  | 30.95 | 41.42    | 8                 | 24.2              |
| 49  | RKKRRARRR   | 51.62  | 38.01 | 44.81    | 8                 | 23.5              |
| 50  | RRRRRRRRR   | 57.96  | 35.39 | 46.67    | 9                 | 27.0              |
| 51  | QNRRMKWKK   | 16.67  | 16.91 | 16.79    | 5                 | 10.7              |
| 52  | RRRERRAEK   | 11.68  | 8.49  | 10.09    | 4                 | 23.5              |
| 53  | KCPSRRPKR   | 30.30  | 35.02 | 32.66    | 5                 | 14.3              |
| 54  | KGKKIFIMK   | 54.93  | 57.09 | 56.01    | 4                 | 4.6               |
| 55  | CGNKRTRGC   | 10.70  | 13.14 | 11.92    | 3                 | 6.8               |
| 56  | MI IYRDLIS  | 8.19   | 6.19  | 7.19     | 0                 | -4.5              |
| 57  | I IYRDLISH  | 4.30   | 12.14 | 8.22     | 1                 | -3.7              |
| 58  | A IYRDLIS   | 3.14   | 3.41  | 3.28     | 0                 | -3.7              |
| 59  | MA IYRDLIS  | 3.91   | 1.92  | 2.92     | 0                 | -3.2              |
| 60  | MIAYRDLIS   | 9.17   | 6.53  | 7.85     | 0                 | -3.2              |
| 61  | MI IARDLIS  | 9.25   | 5.48  | 7.36     | 0                 | -2.7              |
| 62  | MI IYADLIS  | 15.28  | 18.71 | 16.99    | -1                | -8.0              |
| 63  | MI IYRALIS  | 50.68  | 26.71 | 38.70    | 1                 | -8.0              |
| 64  | MI IYRDAIS  | 26.24  | 25.81 | 26.03    | 0                 | -3.2              |
| 65  | MI IYRDLAS  | 11.07  | 6.38  | 8.73     | 0                 | -3.2              |
| 66  | MI IYRDLIA  | 16.88  | 9.37  | 13.12    | 0                 | -5.3              |
| 67  | GRKKRRQRRR  | 32.48  | 26.09 | 29.29    | 8                 | 24.2              |
| 68  | FQNRRMKWKK  | 25.30  | 27.83 | 26.57    | 5                 | 8.2               |
| 69  | RQARRNRRRC  | 68.84  | 68.37 | 68.60    | 6                 | 16.9              |
| 70  | MLLLTRRRST  | 32.67  | 27.88 | 30.27    | 3                 | 1.8               |
| 71  | PRPLPFPRPG  | 3.08   | 2.92  | 3.00     | 2                 | 1.7               |
| 72  | KRIPNKKPKK  | 25.28  | 35.53 | 30.40    | 6                 | 16.4              |
| 73  | RRIPNRRPRR  | 18.36  | 20.73 | 19.54    | 6                 | 16.4              |
| 74  | KKPTIKTTKK  | 4.26   | 2.43  | 3.34     | 5                 | 12.0              |
| 75  | KKTTTKPTKK  | 0.40   | 4.05  | 2.23     | 5                 | 13.4              |
| 76  | DRDRDRDRDR  | 0.40   | -0.30 | 0.05     | 0                 | 30.0              |
| 77  | RTRRNRRRVR  | 23.25  | 22.19 | 22.72    | 7                 | 19.3              |
| 78  | WRFKSKRKV   | 50.28  | 32.83 | 41.56    | 6                 | 10.9              |
| 79  | GKKKKKKKKK  | 10.69  | 7.86  | 9.28     | 9                 | 27.0              |
| 80  | GRRRRRERNK  | 10.91  | 4.51  | 7.71     | 6                 | 24.2              |
| 81  | ARAAARQARA  | 1.70   | 1.48  | 1.59     | 3                 | 6.2               |
| 82  | MI IYRDLISH | 5.54   | 9.19  | 7.36     | 1                 | -5.0              |
| 83  | MI IYRDKKSH | 6.25   | 5.53  | 5.89     | 3                 | 4.6               |

| No. | Sequence      | RFU 1  | RFU 2  | Mean RFU | Net charge pH 7.4 | Hydrophathy score |
|-----|---------------|--------|--------|----------|-------------------|-------------------|
| 84  | MIIFRDLISH    | 13.43  | 8.18   | 10.81    | 1                 | -5.2              |
| 85  | MIISRDLISH    | 2.72   | 2.04   | 2.38     | 1                 | -2.4              |
| 86  | QIISRDLISH    | 3.03   | -0.49  | 1.27     | 1                 | -0.9              |
| 87  | CIISRDLISH    | 13.60  | 12.30  | 12.95    | 1                 | -2.1              |
| 88  | MIIRDLISE     | 5.03   | 1.23   | 3.13     | 0                 | 3.8               |
| 89  | MIIYRAEISH    | 14.89  | 17.40  | 16.15    | 1                 | -3.7              |
| 90  | MIIYARRAEE    | 15.23  | 11.18  | 13.21    | 0                 | 3.8               |
| 91  | LIIFRILISH    | 50.76  | 47.53  | 49.15    | 2                 | -10.5             |
| 92  | RIFIHFRIGC    | 46.60  | 51.34  | 48.97    | 3                 | -5.9              |
| 93  | CWKKKKKKKK    | 98.95  | 86.21  | 92.58    | 8                 | 19.6              |
| 94  | GRKKRRQRRRC   | 133.95 | 86.52  | 110.23   | 8                 | 23.2              |
| 95  | RRRRRRRRRRR   | 25.87  | 26.21  | 26.04    | 11                | 33.0              |
| 96  | WFQNRRMKWKK   | 52.39  | 45.57  | 48.98    | 5                 | 4.8               |
| 97  | GKKKKRKREKL   | 2.95   | 3.21   | 3.08     | 7                 | 25.2              |
| 98  | KRIPNKKPGKK   | 0.74   | 0.03   | 0.39     | 6                 | 16.4              |
| 99  | KTIPSNKPKKK   | 1.59   | 5.07   | 3.33     | 5                 | 13.3              |
| 100 | NRARNRRRVR    | 19.22  | 11.63  | 15.43    | 7                 | 19.4              |
| 101 | YGRKKRRQRRR   | 58.96  | 42.49  | 50.73    | 8                 | 21.9              |
| 102 | PNTRVRPDVSF   | 2.10   | 3.93   | 3.01     | 1                 | 3.6               |
| 103 | PARAARRAARR   | 9.02   | 3.63   | 6.33     | 5                 | 12.5              |
| 104 | YPRAARRAARR   | 12.71  | 28.10  | 20.40    | 5                 | 10.7              |
| 105 | YRAARRAARA    | 24.78  | 35.92  | 30.35    | 5                 | 10.2              |
| 106 | YGRAARRAARR   | 12.04  | 17.87  | 14.96    | 5                 | 10.7              |
| 107 | YAREARRAARR   | 7.64   | 15.56  | 11.60    | 4                 | 13.7              |
| 108 | YEREARRAARR   | 18.66  | 3.96   | 11.31    | 3                 | 17.2              |
| 109 | YKRAARRAARR   | 19.82  | 32.35  | 26.09    | 6                 | 13.7              |
| 110 | YARKARRAARR   | 36.39  | 30.55  | 33.47    | 6                 | 13.7              |
| 111 | YKRKARRAARR   | 26.17  | 40.64  | 33.40    | 7                 | 17.2              |
| 112 | YGRRARRAARR   | 33.71  | 34.46  | 34.09    | 6                 | 14.2              |
| 113 | YGRRARRRARR   | 53.59  | 42.54  | 48.06    | 7                 | 17.7              |
| 114 | YGRRARRRRRR   | 58.08  | 73.04  | 65.56    | 8                 | 21.2              |
| 115 | YGRRRRRRRRR   | 51.95  | 63.81  | 57.88    | 9                 | 24.7              |
| 116 | YRRRRRRRRRR   | 31.85  | 60.05  | 45.95    | 10                | 27.7              |
| 117 | YARAAARQARA   | 5.25   | 7.27   | 6.26     | 3                 | 3.9               |
| 118 | RRRQRKKGKY    | 64.06  | 76.75  | 70.41    | 8                 | 21.9              |
| 119 | YARAARRAARR   | 36.30  | 40.72  | 38.51    | 5                 | 10.2              |
| 120 | MIIYRDLISKK   | 21.52  | 17.40  | 19.46    | 2                 | 1.5               |
| 121 | LIIFRILISHK   | 137.84 | 137.03 | 137.43   | 3                 | -7.5              |
| 122 | LIIFRILISHR   | 56.41  | 46.19  | 51.30    | 3                 | -7.5              |
| 123 | RILQQLLFIHF   | 37.23  | 32.46  | 34.84    | 2                 | -11.1             |
| 124 | IWFQNRRMKWKK  | 76.44  | 64.47  | 70.46    | 5                 | 3.0               |
| 125 | YGRKKRRQRRR   | 66.52  | 92.00  | 79.26    | 9                 | 24.9              |
| 126 | PLSSIFSRI GDP | 6.76   | 5.32   | 6.04     | 0                 | -1.0              |
| 127 | PSSSSSRIGDP   | 18.46  | 13.53  | 15.99    | 0                 | 6.0               |
| 128 | TSPLNIHNGQKL  | 3.11   | 9.11   | 6.11     | 2                 | -2.4              |
| 129 | GRKKRRQRRRPP  | 33.22  | 23.16  | 28.19    | 8                 | 24.2              |
| 130 | KRIPNKKPGKKT  | 5.50   | 7.85   | 6.67     | 6                 | 16.0              |
| 131 | KPRSKNPPKPK   | 29.44  | 3.67   | 16.55    | 6                 | 18.5              |
| 132 | TRRSKRSSHKRF  | 24.37  | 34.90  | 29.64    | 8                 | 18.2              |
| 133 | TFPQTAIGVGAP  | 2.99   | 9.92   | 6.46     | 0                 | -7.4              |

| No. | Sequence      | RFU 1 | RFU 2 | Mean RFU | Net charge pH 7.4 | Hydrophathy score |
|-----|---------------|-------|-------|----------|-------------------|-------------------|
| 134 | KRIIQRILSRNS  | 15.41 | 15.41 | 15.41    | 4                 | 5.8               |
| 135 | KRIHPRLTRSIR  | 8.18  | 8.97  | 8.58     | 6                 | 9.0               |
| 136 | PPRLRKRRLNM   | 9.19  | 15.86 | 12.53    | 5                 | 10.5              |
| 137 | PIRRRKKLRRLK  | 31.20 | 38.26 | 34.73    | 8                 | 18.6              |
| 138 | RRQRRTSKLMKR  | 10.05 | 16.44 | 13.25    | 7                 | 18.0              |
| 139 | MHKRPTTPSRKM  | 6.36  | 6.21  | 6.28     | 5                 | 8.4               |
| 140 | RQSRRRRPLNIR  | 9.23  | 14.15 | 11.69    | 6                 | 15.1              |
| 141 | RIRMIQNLIKKT  | 19.79 | 24.55 | 22.17    | 4                 | 3.5               |
| 142 | SRRKRQRSNMRI  | 10.00 | 9.14  | 9.57     | 6                 | 15.9              |
| 143 | QRIRKSKISRTL  | 11.23 | 12.81 | 12.02    | 5                 | 10.0              |
| 144 | PSKRL LHNNLRR | 12.29 | 4.26  | 8.28     | 5                 | 6.8               |
| 145 | HRHIRRQSLIML  | 22.17 | 27.48 | 24.83    | 5                 | 0.0               |
| 146 | PQNRLQIRRHSK  | 19.27 | 14.71 | 16.99    | 5                 | 8.8               |
| 147 | PPHNRIQRRLNM  | 3.59  | 2.12  | 2.85     | 4                 | 4.2               |
| 148 | SMLKRNHSTSNR  | 13.89 | 4.16  | 9.02     | 4                 | 6.3               |
| 149 | GSRHPSLIIPRQ  | 7.41  | 5.02  | 6.21     | 3                 | 0.9               |
| 150 | SPMQKTMNLPPM  | 18.22 | 13.69 | 15.95    | 1                 | -2.4              |
| 151 | NKRILIRIMTRP  | 77.94 | 87.01 | 82.48    | 4                 | 3.3               |
| 152 | LTRNYEAWVPTP  | 5.57  | 10.39 | 7.98     | 0                 | -4.1              |
| 153 | YSHIATLPFTPT  | 6.62  | 3.56  | 5.09     | 1                 | -10.3             |
| 154 | SYIQRTPTSTLP  | 45.16 | 20.00 | 32.58    | 1                 | -3.3              |
| 155 | AVPAENALNPNF  | 26.30 | 5.20  | 15.75    | -1                | -3.7              |
| 156 | SFHQFARATLAS  | 31.01 | 2.94  | 16.98    | 2                 | -5.4              |
| 157 | QSPTDFTFPNPL  | 13.35 | 4.56  | 8.96     | -1                | -3.9              |
| 158 | HFAAWGGWSLVH  | 18.56 | 6.63  | 12.59    | 2                 | -14.3             |
| 159 | HIQLSPFSQSWR  | 28.53 | 11.26 | 19.90    | 2                 | -5.7              |
| 160 | LTMPSDLQPVLW  | 11.88 | 8.61  | 10.24    | -1                | -8.5              |
| 161 | FQPYDHPAEVSY  | 3.34  | 16.86 | 10.10    | -1                | -3.1              |
| 162 | FDPFFWKYSPRD  | 61.31 | 60.58 | 60.94    | 0                 | -0.9              |
| 163 | FAPWDTASFMLG  | 3.45  | 3.29  | 3.37     | -1                | -9.6              |
| 164 | FTYKNFFWLPEL  | 53.26 | 47.29 | 50.28    | 0                 | -11.0             |
| 165 | SATGAPWKMWVR  | 13.23 | 10.05 | 11.64    | 2                 | -4.7              |
| 166 | SLGWMLPFSPPF  | 11.69 | 6.52  | 9.11     | 0                 | -12.7             |
| 167 | SHAFTWPTYLQL  | 14.60 | 6.36  | 10.48    | 1                 | -13.1             |
| 168 | SHNWLPLWPLRP  | 88.18 | 23.78 | 55.98    | 2                 | -9.2              |
| 169 | SWLPYPWHVPSS  | 4.82  | 3.94  | 4.38     | 1                 | -12.0             |
| 170 | SWWTPWHVHSES  | 7.06  | 3.01  | 5.04     | 1                 | -9.2              |
| 171 | SWAQHLSLPPVL  | 18.25 | 7.05  | 12.65    | 1                 | -10.5             |
| 172 | SSSIFPPWLSFF  | 48.35 | 23.97 | 36.16    | 0                 | -13.3             |
| 173 | LNVPSPWFLSQR  | 22.23 | 8.03  | 15.13    | 1                 | -7.0              |
| 174 | LDITPFLSLTLP  | 58.45 | 31.89 | 45.17    | -1                | -9.0              |
| 175 | LPHPVLHMGPLR  | 26.53 | 6.66  | 16.59    | 3                 | -6.2              |
| 176 | VSKQPYYMWNGN  | 8.31  | 5.59  | 6.95     | 1                 | -6.9              |
| 177 | NYTTYKSHFQDR  | 2.09  | 12.39 | 7.24     | 2                 | 1.3               |
| 178 | AIPNNQLGFPEFK | 6.54  | 3.81  | 5.18     | 1                 | -5.5              |
| 179 | NIENSTLATPLS  | 2.27  | 0.87  | 1.57     | -1                | -2.7              |
| 180 | YPYDANHTRSPT  | 10.05 | 5.21  | 7.63     | 1                 | 0.1               |
| 181 | DPATNPGPHFPR  | 8.88  | -0.68 | 4.10     | 1                 | 2.3               |
| 182 | TLPSPLALLTVH  | 24.95 | 12.79 | 18.87    | 1                 | -10.2             |
| 183 | HPGSPFPPEHRP  | 6.55  | 0.51  | 3.53     | 2                 | 2.8               |

| No. | Sequence       | RFU 1  | RFU 2  | Mean RFU | Net charge pH 7.4 | Hydrophathy score |
|-----|----------------|--------|--------|----------|-------------------|-------------------|
| 184 | TSHTDAPPARSP   | 0.97   | 2.06   | 1.51     | 1                 | 4.3               |
| 185 | MTPSSLSTLPWP   | 6.75   | 3.89   | 5.32     | 0                 | -8.2              |
| 186 | VLGQSGYLMPMR   | 2.24   | 20.64  | 11.44    | 1                 | -6.5              |
| 187 | QPIIITSPYLPS   | 3.58   | 3.22   | 3.40     | 0                 | -9.1              |
| 188 | TPKTMQTQYDFS   | 1.73   | 0.34   | 1.04     | 0                 | -1.2              |
| 189 | NSGTMQSASRAT   | 5.74   | 1.64   | 3.69     | 1                 | 1.2               |
| 190 | QAASRVENYMR    | 1.60   | 0.52   | 1.06     | 2                 | 3.1               |
| 191 | HQHKPPPLTNNW   | 6.56   | 6.79   | 6.68     | 3                 | -3.0              |
| 192 | SNPWDSL SVST   | 1.92   | 2.77   | 2.35     | -1                | -4.5              |
| 193 | KTIEAHPPYYAS   | 8.11   | 4.36   | 6.23     | 1                 | -2.0              |
| 194 | EPDNWSLDFPRR   | 2.96   | 3.00   | 2.98     | -1                | 7.8               |
| 195 | WRFKWRFKWRFK   | 127.09 | 181.82 | 154.46   | 6                 | 0.3               |
| 196 | APWHLSSQYSRT   | 4.34   | 5.13   | 4.73     | 2                 | -4.8              |
| 197 | GRKGKHKRKKLP   | 13.68  | 13.97  | 13.82    | 8                 | 18.7              |
| 198 | GRRRRKRLSHRT   | 17.59  | 23.94  | 20.76    | 8                 | 18.6              |
| 199 | SQMTRQARRLYV   | 6.98   | 12.55  | 9.76     | 3                 | 1.9               |
| 200 | MIIYRALISHKK   | 83.94  | 80.04  | 81.99    | 4                 | -2.5              |
| 201 | MIIYRIAASHKK   | 42.66  | 54.46  | 48.56    | 4                 | -1.2              |
| 202 | MIIFRIAASHKK   | 111.63 | 129.08 | 120.36   | 4                 | -1.4              |
| 203 | MIIFRALISHKK   | 154.43 | 237.03 | 195.73   | 4                 | -2.7              |
| 204 | MIIFRAAASHKK   | 75.10  | 58.76  | 66.93    | 4                 | -0.1              |
| 205 | FIIFRIAASHKK   | 248.98 | 294.27 | 271.62   | 4                 | -2.6              |
| 206 | LIIFRIAASHKK   | 168.75 | 243.30 | 206.03   | 4                 | -1.9              |
| 207 | WIIFRIAASHKK   | 171.44 | 184.39 | 177.92   | 4                 | -3.5              |
| 208 | WIIFRAAASHKK   | 92.58  | 90.13  | 91.36    | 4                 | -2.2              |
| 209 | WIIFRALISHKK   | 194.27 | 176.52 | 185.39   | 4                 | -4.8              |
| 210 | MIIFRIAAYHKK   | 168.20 | 182.24 | 175.22   | 4                 | -4.0              |
| 211 | WIIFRIAAYHKK   | 191.01 | 186.52 | 188.76   | 4                 | -6.1              |
| 212 | MIIFRIAATHKK   | 225.35 | 172.63 | 198.99   | 4                 | -2.1              |
| 213 | WIIFRIAATHKK   | 289.67 | 256.44 | 273.05   | 4                 | -4.2              |
| 214 | MIIFKIAASHKK   | 91.97  | 95.79  | 93.88    | 4                 | -1.4              |
| 215 | WIIFKIAASHKK   | 127.04 | 147.00 | 137.02   | 4                 | -3.5              |
| 216 | MIIFAIAASHKK   | 89.85  | 98.48  | 94.17    | 3                 | -4.9              |
| 217 | LIIFRILISHKK   | 153.55 | 150.97 | 152.26   | 4                 | -4.5              |
| 218 | MIIFRILISHKK   | 131.43 | 153.29 | 142.36   | 4                 | -4.0              |
| 219 | LIIFRILISHRR   | 165.30 | 75.39  | 120.35   | 4                 | -4.5              |
| 220 | LIIFRILISHHH   | 96.79  | 100.62 | 98.71    | 4                 | -11.5             |
| 221 | LIIFAIASHKK    | 127.14 | 150.12 | 138.63   | 3                 | -5.4              |
| 222 | LIIFAILISHKK   | 31.45  | 34.39  | 32.92    | 3                 | -8.0              |
| 223 | GRKKRRQRRRPPQ  | 19.55  | 39.24  | 29.40    | 8                 | 24.4              |
| 224 | GRKKRRQRRPPQC  | 81.88  | 122.62 | 102.25   | 7                 | 20.4              |
| 225 | RQIKIWFQNRMK   | 53.44  | 78.98  | 66.21    | 5                 | 4.8               |
| 226 | KIWFQNRMKWKK   | 46.19  | 56.97  | 51.58    | 6                 | 6.0               |
| 227 | GRKKRRQRRRPWQ  | 50.70  | 120.37 | 85.54    | 8                 | 21.0              |
| 228 | ALWKTL LKVKLKA | 61.21  | 87.24  | 74.23    | 4                 | -1.5              |
| 229 | GRRRRRRRRRPPQ  | 59.77  | 101.83 | 80.80    | 9                 | 27.2              |
| 230 | KRVSRNKSEKKRR  | 13.70  | 23.48  | 18.59    | 7                 | 26.3              |
| 231 | RRHCRSKAKRSR   | 67.58  | 128.25 | 97.91    | 9                 | 19.1              |
| 232 | GPFHFYQFLFPV   | 38.20  | 39.46  | 38.83    | 1                 | -15.9             |
| 233 | GSPWGLQHHPRT   | 1.53   | 2.01   | 1.77     | 3                 | -3.1              |

| No. | Sequence         | RFU 1  | RFU 2  | Mean RFU | Net charge pH 7.4 | Hydrophathy score |
|-----|------------------|--------|--------|----------|-------------------|-------------------|
| 234 | CVQWSLLRGYQPC    | 49.80  | 55.71  | 52.75    | 1                 | -9.1              |
| 235 | KLIKGRTPIKFGK    | 5.89   | 6.87   | 6.38     | 5                 | 6.7               |
| 236 | VRRFLVTLRIRRA    | 178.62 | 171.40 | 175.01   | 5                 | 3.2               |
| 237 | RVRVFFVHPIRLT    | 261.48 | 288.41 | 274.94   | 4                 | -4.0              |
| 238 | GYGRKKRRQRRRG    | 66.84  | 89.27  | 78.06    | 8                 | 21.9              |
| 239 | SAETVESCLAKSH    | 38.07  | 50.56  | 44.32    | 0                 | 3.7               |
| 240 | YRFKYRFKYRLF     | 126.26 | 206.96 | 166.61   | 6                 | 1.8               |
| 241 | RQIKIWFQNRMKW    | 89.70  | 156.39 | 123.04   | 5                 | 1.4               |
| 242 | IKIWFQNRMKWKK    | 177.08 | 198.09 | 187.58   | 6                 | 4.2               |
| 243 | GRKKRRQRRRPPQC   | 155.42 | 186.67 | 171.04   | 8                 | 23.4              |
| 244 | SRRARRSPRHLGSG   | 4.67   | 7.46   | 6.07     | 6                 | 13.1              |
| 245 | KKPGKKTTPKPTK    | 12.05  | 20.65  | 16.35    | 7                 | 19.4              |
| 246 | ERERERERERERER   | 2.79   | 1.37   | 2.08     | 0                 | 42.0              |
| 247 | WRWRWRWRWRWR     | 53.30  | 60.30  | 56.80    | 7                 | -2.8              |
| 248 | GRRRRATAKYRTAH   | 34.08  | 36.15  | 35.11    | 7                 | 12.9              |
| 249 | RLSGMNEVLSFRWL   | 40.88  | 19.05  | 29.97    | 1                 | -4.3              |
| 250 | RQIKIWFQNRMKWK   | 258.78 | 230.35 | 244.57   | 6                 | 4.4               |
| 251 | QIKIWFQNRMKWKK   | 194.51 | 179.41 | 186.96   | 6                 | 4.4               |
| 252 | TRRQTRRARNRGC    | 129.11 | 101.52 | 115.32   | 8                 | 22.1              |
| 253 | KWFETWTFEWPKKRK  | 65.68  | 68.73  | 67.21    | 3                 | 5.0               |
| 254 | PPKSAQCLRYKKPE   | 16.34  | 15.13  | 15.73    | 4                 | 12.9              |
| 255 | DPVDTPNPTRKPGK   | 5.34   | 12.67  | 9.01     | 2                 | 15.9              |
| 256 | GKRKKKGKLGKCRDP  | 6.85   | 10.49  | 8.67     | 8                 | 28.2              |
| 257 | KLWMRWYSPTTTRYG  | 98.47  | 106.49 | 102.48   | 4                 | -3.0              |
| 258 | DSLKSYWYLQKFSWR  | 61.66  | 73.33  | 67.50    | 2                 | -4.4              |
| 259 | RTLVEYKNTLKFSK   | 8.99   | 10.74  | 9.86     | 3                 | 5.0               |
| 260 | IPSRWKDQFWKRWHY  | 106.20 | 125.84 | 116.02   | 4                 | -1.8              |
| 261 | GYGNCRHFQKPRRD   | 70.25  | 67.03  | 68.64    | 5                 | 12.1              |
| 262 | KNAWKHSSCHHRHQI  | 25.42  | 25.86  | 25.64    | 7                 | 1.3               |
| 263 | RVREWWYITITLKQES | 45.36  | 48.53  | 46.94    | 1                 | 0.5               |
| 264 | QQHLLIAINGYPRYN  | 24.40  | 25.13  | 24.77    | 2                 | -9.0              |
| 265 | WKCRRCFRVLHHWN   | 90.28  | 100.43 | 95.36    | 6                 | -3.2              |
| 266 | RLWMRWYSPTTTRYG  | 91.42  | 117.40 | 104.41   | 4                 | -3.0              |
| 267 | KLWMRWYSATTTRYG  | 122.95 | 129.11 | 126.03   | 4                 | -3.5              |
| 268 | KLWMRWYSPWTRRYG  | 132.74 | 106.38 | 119.56   | 4                 | -6.0              |
| 269 | RLWMRWYSPWTRRYG  | 36.06  | 32.07  | 34.06    | 4                 | -6.0              |
| 270 | RAWMRWYSPTTTRYG  | 29.62  | 28.20  | 28.91    | 4                 | -1.7              |
| 271 | RLAMRWYSPTTTRYG  | 65.58  | 68.17  | 66.87    | 4                 | -0.1              |
| 272 | RLWARWYSPTTTRYG  | 57.53  | 72.85  | 65.19    | 4                 | -2.2              |
| 273 | RLWMRWASPTTTRYG  | 84.25  | 82.65  | 83.45    | 4                 | -1.2              |
| 274 | RLWMRWYAPTTRYG   | 75.85  | 121.00 | 98.42    | 4                 | -3.8              |
| 275 | RLWMRWYSPATTRYG  | 88.23  | 126.61 | 107.42   | 4                 | -3.1              |
| 276 | RLWMRWYSPTARRYG  | 76.93  | 101.02 | 88.98    | 4                 | -3.1              |
| 277 | RLWMRWYSPTTRRAG  | 162.13 | 177.12 | 169.63   | 4                 | -1.2              |
| 278 | RLWMRWYSPTTRYA   | 134.28 | 162.69 | 148.49   | 4                 | -3.5              |
| 279 | RLFMRFYSPTRYG    | 90.44  | 95.60  | 93.02    | 4                 | -1.2              |
| 280 | RLIMRIYSPTRYG    | 93.28  | 95.18  | 94.23    | 4                 | 0.2               |
| 281 | RLVMRVYSPTRYG    | 145.19 | 137.49 | 141.34   | 4                 | 0.8               |
| 282 | RLYMRYYSPTRYG    | 70.93  | 99.63  | 85.28    | 4                 | -0.8              |
| 283 | RRIRPRPRLPRRP    | 29.31  | 30.64  | 29.97    | 7                 | 17.4              |

| No. | Sequence          | RFU 1  | RFU 2  | Mean RFU | Net charge pH 7.4 | Hydrophathy score |
|-----|-------------------|--------|--------|----------|-------------------|-------------------|
| 284 | RQLRIAGRRLRGRSR   | 18.40  | 32.01  | 25.20    | 7                 | 15.6              |
| 285 | KSICKTIPSNKPKKK   | 17.81  | 23.37  | 20.59    | 6                 | 13.8              |
| 286 | QTRRRERRAEKQAQW   | 12.87  | 13.15  | 13.01    | 4                 | 19.8              |
| 287 | KFHTFPQTAIGVGAP   | 5.12   | 2.69   | 3.91     | 2                 | -7.4              |
| 288 | FLGKKFKKYFLQLLK   | 298.36 | 283.51 | 290.93   | 5                 | -1.8              |
| 289 | RVIRWFQNKRCCKDKK  | 129.42 | 140.33 | 134.88   | 6                 | 14.2              |
| 290 | RVIRWFQNKRSKDKK   | 76.95  | 64.97  | 70.96    | 6                 | 15.5              |
| 291 | CWKKKKKKKKKKKKK   | 175.27 | 145.30 | 160.28   | 13                | 34.6              |
| 292 | GKRRRRATAKYRSAH   | 20.15  | 27.54  | 23.85    | 8                 | 16.6              |
| 293 | TRNKRNRIOEQLNRK   | 5.69   | 1.60   | 3.65     | 5                 | 18.0              |
| 294 | RILQQLLFIHFRIGC   | 80.06  | 72.19  | 76.13    | 3                 | -10.9             |
| 295 | FITKALGISYGRKKRR  | 49.25  | 71.45  | 60.35    | 6                 | 7.2               |
| 296 | KLALKLALKALKAALK  | 545.23 | 411.56 | 478.40   | 5                 | 1.7               |
| 297 | AQIKIWFQNRMKWKK   | 142.95 | 137.50 | 140.22   | 6                 | 3.9               |
| 298 | RAIKIWFQNRMKWKK   | 75.31  | 95.10  | 85.21    | 7                 | 6.7               |
| 299 | RQAKIWFQNRMKWKK   | 61.10  | 98.25  | 79.67    | 7                 | 8.7               |
| 300 | RQIAIWFQNRMKWKK   | 164.31 | 141.04 | 152.67   | 6                 | 3.9               |
| 301 | RQIKAWFQNRMKWKK   | 53.46  | 69.23  | 61.35    | 7                 | 8.7               |
| 302 | RQIKIAFQNRMKWKK   | 121.17 | 124.24 | 122.70   | 7                 | 10.3              |
| 303 | RQIKIWAQNRMKWKK   | 77.02  | 75.93  | 76.48    | 7                 | 9.4               |
| 304 | RQIKIWFANRRMKWKK  | 176.15 | 156.11 | 166.13   | 7                 | 6.7               |
| 305 | RQIKIWFQARRMKWKK  | 188.39 | 174.83 | 181.61   | 7                 | 6.7               |
| 306 | RQIKIWFQARMKWKK   | 75.87  | 130.88 | 103.37   | 6                 | 3.9               |
| 307 | RQIKIWFQNRAMKWKK  | 108.70 | 125.54 | 117.12   | 6                 | 3.9               |
| 308 | RQIKIWFQNRRAKWKK  | 157.08 | 158.96 | 158.02   | 7                 | 8.2               |
| 309 | RQIKIWFQNRMKAKK   | 120.43 | 125.54 | 122.98   | 7                 | 10.3              |
| 310 | RQIKIWFQNRMKWKK   | 137.08 | 141.77 | 139.42   | 7                 | 7.2               |
| 311 | RVIRVWFQNKRCCKDKK | 116.51 | 121.08 | 118.79   | 6                 | 12.7              |
| 312 | GRRHCRSKAKRSRHH   | 74.92  | 78.91  | 76.92    | 11                | 18.1              |
| 313 | SARHCRSKAKRSRHH   | 44.46  | 47.69  | 46.07    | 10                | 14.9              |
| 314 | SRAHCRSKAKRSRHH   | 44.97  | 47.65  | 46.31    | 10                | 14.9              |
| 315 | SRRACRSKAKRSRHH   | 55.36  | 60.31  | 57.83    | 10                | 18.4              |
| 316 | SRRHACRSKAKRSRHH  | 60.63  | 79.99  | 70.31    | 10                | 18.4              |
| 317 | SRRHHARSKAKRSRHH  | 10.17  | 12.49  | 11.33    | 11                | 18.9              |
| 318 | SRRHCRAKAKRSRHH   | 69.53  | 69.01  | 69.27    | 11                | 17.6              |
| 319 | SRRHCRSAAKRSRHH   | 58.01  | 43.24  | 50.63    | 10                | 14.9              |
| 320 | SRRHCRSKAARSRHH   | 50.32  | 59.45  | 54.88    | 10                | 14.9              |
| 321 | SRRHCRSKAKASRHH   | 49.04  | 46.18  | 47.61    | 10                | 14.9              |
| 322 | SRRHCRSKAKRARHH   | 59.43  | 63.51  | 61.47    | 11                | 17.6              |
| 323 | SRRHCRSKAKRSAHH   | 47.11  | 51.72  | 49.41    | 10                | 14.9              |
| 324 | RQIKIFFQNRMKFKK   | 208.83 | 212.46 | 210.65   | 7                 | 9.2               |
| 325 | RQIRIWFQNRMRWRR   | 106.92 | 101.29 | 104.11   | 7                 | 7.4               |
| 326 | RKKRRRESRKKRRRES  | 65.81  | 67.40  | 66.60    | 10                | 42.6              |
| 327 | LRRERQSRLLRRERQSR | 25.48  | 95.20  | 60.34    | 6                 | 27.4              |
| 328 | KKWKMBRNQFWIKIQR  | 81.81  | 82.47  | 82.14    | 7                 | 7.4               |
| 329 | RQPKIWFQNRKRWKK   | 58.45  | 65.64  | 62.04    | 7                 | 10.3              |
| 330 | CSIPPEVKFNPFVYLI  | 102.64 | 66.08  | 84.36    | 0                 | -10.2             |
| 331 | GLRKRLRKFRNKIKEK  | 35.52  | 52.25  | 43.88    | 8                 | 22.3              |
| 332 | RRWRRWRRWRRWRR    | 75.17  | 33.28  | 54.22    | 10                | 9.6               |
| 333 | RQIKIWFQNMRRKWKK  | 187.38 | 203.15 | 195.27   | 7                 | 7.4               |

| No. | Sequence              | RFU 1  | RFU 2  | Mean RFU | Net charge pH 7.4 | Hydrophathy score |
|-----|-----------------------|--------|--------|----------|-------------------|-------------------|
| 334 | GRQLRIAGKRLEGRSK      | 6.04   | 3.15   | 4.60     | 5                 | 15.6              |
| 335 | GRQLRIAGKRLRGRSK      | 28.39  | 23.67  | 26.03    | 7                 | 15.6              |
| 336 | GRQLRIAGRRLRGRSR      | 15.47  | 16.04  | 15.76    | 7                 | 15.6              |
| 337 | GRQLRRAGRRLRGRSR      | 18.24  | 26.40  | 22.32    | 8                 | 20.4              |
| 338 | GRQLRIAGRRLRRRSR      | 20.34  | 34.59  | 27.46    | 8                 | 18.6              |
| 339 | GRQLRRAGRRLRRRSR      | 28.12  | 41.03  | 34.57    | 9                 | 23.4              |
| 340 | KRPAAIKKAGQAKKKK      | 9.43   | 19.29  | 14.36    | 8                 | 20.4              |
| 341 | YIVLRRRRRKRVNTKRS     | 160.77 | 228.77 | 194.77   | 8                 | 15.2              |
| 342 | KTVLLRKLKLLVLRKI      | 899.75 | 811.38 | 855.56   | 6                 | 2.0               |
| 343 | LLKKRKVVRLIKFLK       | 449.07 | 421.53 | 435.30   | 7                 | 4.7               |
| 344 | KKICTRKPRFMSAWAQ      | 93.11  | 86.68  | 89.89    | 5                 | 4.1               |
| 345 | RHIKIWFQNRMKWKK       | 124.87 | 161.78 | 143.32   | 8                 | 6.7               |
| 346 | RLWRALPRVLRLLRP       | 175.20 | 204.40 | 189.80   | 6                 | 3.6               |
| 347 | KLWSAWPSLWSSLWKP      | 110.15 | 97.57  | 103.86   | 2                 | -12.3             |
| 348 | AAVALLPAVLLALLAK      | 160.27 | 162.37 | 161.32   | 1                 | -13.8             |
| 349 | GKHRHERGHHRDRRER      | 13.62  | 7.55   | 10.58    | 8                 | 28.0              |
| 350 | RQIKIFFQNRMKWKK       | 253.88 | 224.34 | 239.11   | 7                 | 8.3               |
| 351 | YTAIAVVKAFIRKLRK      | 414.26 | 388.37 | 401.31   | 5                 | -2.0              |
| 352 | AAVALLPAVLLALLAP      | 119.74 | 144.08 | 131.91   | 0                 | -16.8             |
| 353 | RQIKIWFQNRMKWKK       | 205.31 | 154.16 | 179.74   | 7                 | 7.4               |
| 354 | GKINLKALAAALAKKIL     | 127.94 | 109.09 | 118.51   | 4                 | -0.6              |
| 355 | TRQARRNRRRRWREQR      | 118.36 | 129.32 | 123.84   | 9                 | 29.3              |
| 356 | RRRRNRTRNRRRRVGRC     | 88.28  | 58.25  | 73.27    | 11                | 30.5              |
| 357 | GRPRESGKKRKRKRLKP     | 27.63  | 33.18  | 30.40    | 9                 | 31.5              |
| 358 | GKRKKKGKLGKKRPRSR     | 57.48  | 49.62  | 53.55    | 11                | 31.5              |
| 359 | RKKRRRESRKKRRRESC     | 111.40 | 104.67 | 108.04   | 10                | 41.6              |
| 360 | DRDDRRDRDDRRDDR       | 1.99   | 2.12   | 2.05     | -5                | 51.0              |
| 361 | DRRRRGSRPSGAERRR      | 12.99  | 14.01  | 13.50    | 7                 | 33.1              |
| 362 | RAGLQFPVGRVHRLLRK     | 15.97  | 12.96  | 14.46    | 6                 | 3.3               |
| 363 | GKKTNLFSALIKKKKTA     | 11.31  | 22.57  | 16.94    | 6                 | 8.8               |
| 364 | GKKRKLKSNRESAKRSR     | 5.81   | 9.52   | 7.67     | 8                 | 28.8              |
| 365 | IAWVKAFIRKLRKGPLG     | 175.17 | 142.95 | 159.06   | 5                 | -0.6              |
| 366 | CRQIKIWFQNRMKWKK      | 111.51 | 101.59 | 106.55   | 7                 | 6.4               |
| 367 | KGEGAAVLLPVLLAAPG     | 3.04   | 8.58   | 5.81     | 0                 | -6.2              |
| 368 | MGLGLHLLVLAALQGA      | 34.76  | 28.92  | 31.84    | 1                 | -15.9             |
| 369 | GALFLGWGAAGSTMGA      | 7.35   | 9.68   | 8.52     | 0                 | -14.7             |
| 370 | RILQQLLFIHFRIGCRH     | 95.18  | 80.35  | 87.76    | 5                 | -8.4              |
| 371 | LGISYGRKKRRQRRPPQ     | 70.36  | 68.94  | 69.65    | 8                 | 18.8              |
| 372 | KLALKLALKAWKAALKLA    | 331.37 | 287.31 | 309.34   | 5                 | -2.2              |
| 373 | KALAKALAKLWKALAKAA    | 351.80 | 339.37 | 345.58   | 5                 | 0.4               |
| 374 | KALKKLLAKWLAAKALL     | 280.41 | 297.33 | 288.87   | 5                 | -2.2              |
| 375 | KLAAALLKKWKLLAAALL    | 322.69 | 349.10 | 335.89   | 5                 | -2.2              |
| 376 | KALAALLKKWAKLLAALK    | 268.72 | 271.18 | 269.95   | 5                 | -2.2              |
| 377 | KALAALLKKLAKLLAALK    | 204.44 | 233.77 | 219.11   | 5                 | -0.6              |
| 378 | KLALKLALKALQAALQLA    | 294.36 | 255.99 | 275.18   | 3                 | -6.2              |
| 379 | KLALQLALQALQAALQLA    | 85.34  | 69.54  | 77.44    | 1                 | -11.8             |
| 380 | QLALQLALQALQAALQLA    | 122.23 | 76.78  | 99.51    | 0                 | -14.6             |
| 381 | LKTLATALTKLAKTLTTL    | 229.69 | 208.17 | 218.93   | 3                 | -5.7              |
| 382 | LLKTTALLKTTALLKTTA    | 60.19  | 46.42  | 53.31    | 3                 | -5.7              |
| 383 | LLKTTPELLKTTPELLKTTTE | 16.42  | 20.95  | 18.69    | 0                 | 4.8               |



| No. | Sequence              | RFU 1  | RFU 2   | Mean RFU | Net charge pH 7.4 | Hydrophathy score |
|-----|-----------------------|--------|---------|----------|-------------------|-------------------|
| 384 | KALKLKLALALLAKLKLA    | 327.00 | 270.27  | 298.64   | 5                 | -1.9              |
| 385 | CRQIKIWFNRRMKWKKC     | 89.08  | 87.68   | 88.38    | 7                 | 5.2               |
| 386 | RKKRRRESRRARRSPRHL    | 54.22  | 83.19   | 68.70    | 11                | 33.8              |
| 387 | LLIILRRRIRKQAHAAHSK   | 228.82 | 222.63  | 225.72   | 8                 | 5.7               |
| 388 | LLIILARRIRKQAHAAHSK   | 161.55 | 164.49  | 163.02   | 7                 | 2.2               |
| 389 | LLIILRARIRKQAHAAHSK   | 220.49 | 200.51  | 210.50   | 7                 | 2.2               |
| 390 | LLIILRAAIRKQAHAAHSK   | 196.23 | 222.87  | 209.55   | 7                 | 2.2               |
| 391 | LLIILRRRIRAQAHAAHSK   | 219.10 | 197.64  | 208.37   | 7                 | 2.2               |
| 392 | LLIILRRRIRKAAHAAHSK   | 246.09 | 256.69  | 251.39   | 8                 | 5.0               |
| 393 | LLIILRRRIRKQAHAAASK   | 238.90 | 224.92  | 231.91   | 7                 | 5.7               |
| 394 | LLIILRRRIRKQAHAAHAK   | 238.46 | 224.29  | 231.37   | 8                 | 4.9               |
| 395 | LLIILRRRIRKQAHAAHSA   | 259.37 | 231.11  | 245.24   | 7                 | 2.2               |
| 396 | VRLPPPVRLLPPPVRLLPPP  | 18.90  | 14.51   | 16.70    | 3                 | -0.9              |
| 397 | VKLPPPVKLPPPVKLPPP    | 31.52  | 21.65   | 26.59    | 3                 | -0.9              |
| 398 | DFNKFHTFPQTAIGVGAP    | 11.64  | 10.05   | 10.84    | 1                 | -6.7              |
| 399 | LGLLLRHLRHHSNLLANI    | 222.32 | 147.05  | 184.69   | 5                 | -9.7              |
| 400 | GKRVAKRKLIEQNRERRR    | 16.79  | 36.26   | 26.52    | 7                 | 27.8              |
| 401 | GRKLKKKKNEKEDKRPRT    | 20.66  | 13.48   | 17.07    | 7                 | 37.0              |
| 402 | GRRERNKMAAAKCRNRRR    | 65.39  | 107.82  | 86.61    | 8                 | 26.6              |
| 403 | GKRARNTEAARRSRARKL    | 31.95  | 15.06   | 23.50    | 7                 | 23.3              |
| 404 | TAKTRYKARRAELIAERR    | 13.72  | 29.91   | 21.81    | 5                 | 18.3              |
| 405 | KLALKLALKALKAAALKLA   | 425.81 | 455.01  | 440.41   | 5                 | -0.6              |
| 406 | NAKTRRHERRRKLAIERGC   | 38.44  | 55.58   | 47.01    | 7                 | 23.7              |
| 407 | SRRARRSPRESGKKRKRKR   | 38.35  | 67.00   | 52.67    | 11                | 39.4              |
| 408 | LLIILRRRIARKQAHAAHSK  | 218.54 | 240.27  | 229.41   | 8                 | 5.2               |
| 409 | CVKRGLKLRHVRPRVTRDV   | 95.78  | 75.14   | 85.46    | 7                 | 12.5              |
| 410 | KRIPNKKPGKTTTKPTKK    | 9.74   | 11.26   | 10.50    | 9                 | 23.8              |
| 411 | KLPCRSNTFLNIFRRKKPG   | 149.71 | 144.72  | 147.21   | 6                 | 6.9               |
| 412 | KKKKKKKKKKKKKKKKKKK   | 714.73 | 549.28  | 632.01   | 19                | 57.0              |
| 413 | KCFQWQRNMRKVRGPPVSC   | 72.37  | 67.44   | 69.90    | 5                 | 3.7               |
| 414 | ALWKTLLKKVLKAPKKRKRK  | 138.84 | 148.90  | 143.87   | 9                 | 12.0              |
| 415 | PKKRKRVALWKTLLKKVLKA  | 465.84 | 315.77  | 390.81   | 9                 | 12.0              |
| 416 | VKRKKKPALWKTLLKKVLKA  | 847.15 | 1003.69 | 925.42   | 9                 | 12.0              |
| 417 | AYRIKPTFRRLKWKYKGF    | 185.47 | 149.26  | 167.36   | 8                 | 3.1               |
| 418 | HARIKPTFRRLKWKYKGF    | 125.63 | 82.16   | 103.89   | 9                 | 4.9               |
| 419 | HYRIKPTARRLKWKYKGF    | 85.45  | 74.67   | 80.06    | 9                 | 5.1               |
| 420 | HYRIKPTFRRLAWKYKGF    | 143.87 | 102.01  | 122.94   | 8                 | -0.4              |
| 421 | HYRIKPTFRRLKWKYKGF    | 83.07  | 96.36   | 89.71    | 9                 | 6.0               |
| 422 | GLWRALWRLRLSLWRLWRA   | 39.58  | 17.74   | 28.66    | 5                 | -11.9             |
| 423 | GLWWRLWRLRSWFRLWFRA   | 27.87  | 18.53   | 23.20    | 5                 | -17.8             |
| 424 | GLWRALWRLRLSLWRLWKA   | 54.34  | 42.87   | 48.60    | 5                 | -11.9             |
| 425 | GLWRALWRALRSLWKLKRK   | 413.88 | 355.41  | 384.64   | 7                 | -0.4              |
| 426 | GLWRALWRGLRSLWKLKRK   | 412.88 | 282.45  | 347.66   | 7                 | 0.1               |
| 427 | GLWRALWRGLRSLWKKRKR   | 378.22 | 372.12  | 375.17   | 8                 | 4.9               |
| 428 | WRFKAAVALLPAVLLALLAP  | 48.41  | 54.31   | 51.36    | 2                 | -16.7             |
| 429 | CWKKKKKKKKKKKKKKKKK   | 447.98 | 387.89  | 417.94   | 18                | 49.6              |
| 430 | GLFEALLELLESLWELLLEA  | 110.53 | 67.50   | 89.02    | -5                | -7.8              |
| 431 | GLFKALLKLLKSLWKLKLLKA | 361.81 | 291.52  | 326.66   | 5                 | -7.8              |
| 432 | GLFRALLRLLRSLWRLLLRA  | 107.93 | 67.31   | 87.62    | 5                 | -7.8              |
| 433 | RILQQLLFIHFRIGCRHSRI  | 98.43  | 90.93   | 94.68    | 6                 | -6.9              |

| No. | Sequence                 | RFU 1   | RFU 2  | Mean RFU | Net charge pH 7.4 | Hydrophathy score |
|-----|--------------------------|---------|--------|----------|-------------------|-------------------|
| 434 | KLALKLALKALKAALKLAGC     | 217.31  | 203.08 | 210.19   | 5                 | -1.6              |
| 435 | KMTRAQRRAAARRNRWTARGC    | 98.17   | 100.68 | 99.43    | 8                 | 15.4              |
| 436 | KLTRAQRRAAARKNKRNTRGC    | 107.93  | 107.44 | 107.68   | 9                 | 22.0              |
| 437 | KETWWETWWTEWSQPKKKRKV    | 94.75   | 96.37  | 95.56    | 3                 | 7.8               |
| 438 | KETWFETWFTEWSQPKKKRKV    | 47.66   | 56.84  | 52.25    | 3                 | 9.6               |
| 439 | AGYLLGKINLKALAALAKKIL    | 266.77  | 252.89 | 259.83   | 4                 | -7.0              |
| 440 | YTQDFNKFHTFPQTAIGVGAP    | 8.03    | 12.55  | 10.29    | 1                 | -9.2              |
| 441 | GLWRALWRALWRSLWKLKRV     | 291.93  | 252.26 | 272.09   | 7                 | -3.8              |
| 442 | GLWRALWRALWRSLWKLKWKV    | 205.86  | 205.36 | 205.61   | 6                 | -10.2             |
| 443 | GLWRALWRALWRSLWKSRRKV    | 288.44  | 250.82 | 269.63   | 7                 | -1.7              |
| 444 | GLWRALWRALWRSLWKKRRKV    | 324.82  | 261.27 | 293.05   | 8                 | 1.0               |
| 445 | ASMWERVKSIIKSSLAASNI     | 24.03   | 30.32  | 27.17    | 2                 | -1.7              |
| 446 | RQARRNRRRALWKTLLKVKLKA   | 492.51  | 409.43 | 450.97   | 10                | 16.4              |
| 447 | GAYDLRRRERQSRLRRRERQSR   | 31.54   | 30.07  | 30.80    | 7                 | 33.6              |
| 448 | TKRRITPKDVIDVRSVTTEINT   | 4.49    | 2.31   | 3.40     | 2                 | 12.6              |
| 449 | TKRRITPKKVIDVRSVTTEINT   | 12.47   | 9.40   | 10.94    | 4                 | 12.6              |
| 450 | TKRRITPKDVIDVRSVTTKINT   | 7.81    | 4.07   | 5.94     | 4                 | 12.6              |
| 451 | MVRRFLVTLRIRACGPPRVRV    | 49.62   | 38.02  | 43.82    | 7                 | 3.9               |
| 452 | FVTRGCPRRVARLIRVMVPRR    | 185.18  | 129.04 | 157.11   | 7                 | 3.9               |
| 453 | MVTVLFRRRLRIRACGPPRVRV   | 89.51   | 65.95  | 77.73    | 7                 | 3.9               |
| 454 | RVTSWLGRQLRIAGKRLEGRSK   | 92.28   | 63.50  | 77.89    | 6                 | 11.8              |
| 455 | RVRSWLGRQLRIAGKRLEGRSK   | 71.96   | 71.83  | 71.89    | 7                 | 15.2              |
| 456 | KKPGKTTTKPTKKPTIKTTKK    | 12.48   | 11.52  | 12.00    | 10                | 25.4              |
| 457 | DRRRRGSRPSGAERRRRRAAAA   | 12.40   | 15.02  | 13.71    | 8                 | 34.1              |
| 458 | KCFQWQRNMRKVRGPPVSCIKR   | 104.13  | 79.26  | 91.69    | 7                 | 7.9               |
| 459 | AAVALLPAVLLALLAPRRRRRR   | 115.31  | 100.52 | 107.91   | 6                 | 1.2               |
| 460 | GLGSLKKGAKKQPKSKRV       | 41.79   | 39.15  | 40.47    | 9                 | 18.6              |
| 461 | KCFMWQEMLNKAGVPKLRCAK    | 82.55   | 81.78  | 82.16    | 5                 | 4.8               |
| 462 | DTWAGVEAIRILQQLLFIFHR    | 86.68   | 65.88  | 76.28    | 1                 | -12.0             |
| 463 | GEQIAQLIAGYIDIILKKKSK    | 231.55  | 159.53 | 195.54   | 3                 | 5.8               |
| 464 | FITKALGISYGRKKRRQRRPPQ   | 117.46  | 123.66 | 120.56   | 9                 | 16.6              |
| 465 | MGLGLHLLVLAALQGAKKRRKV   | 317.74  | 277.58 | 297.66   | 6                 | -2.4              |
| 466 | LIRLWSHLIHIWFQNRRLKWKKK  | 521.62  | 329.58 | 425.60   | 9                 | -4.6              |
| 467 | CGAYDLRRRERQSRLRRRERQSR  | 69.79   | 29.32  | 49.56    | 7                 | 32.6              |
| 468 | RRVTSWLGRQLRIAGKRLEGRSK  | 179.47  | 112.54 | 146.00   | 7                 | 14.8              |
| 469 | KRIPNKKPGKTTTKPTKKPTIK   | 18.91   | 20.46  | 19.69    | 10                | 24.6              |
| 470 | FLIFIRVICIVIAKLNLMCKT    | 31.61   | 31.09  | 31.35    | 4                 | -14.9             |
| 471 | WLRRIKAWLRRIKALNRQLGVAA  | 1097.27 | 925.57 | 1011.42  | 7                 | 0.3               |
| 472 | MDAQTRRRERRAEKQAQQWKAAN  | 16.48   | 12.16  | 14.32    | 4                 | 23.4              |
| 473 | LNSAGYLLGKINLKALAALAKKIL | 467.70  | 376.56 | 422.13   | 4                 | -8.3              |
| 474 | LGTYTQDFNKFHTFPQTAIGVGAP | 15.89   | 14.55  | 15.22    | 1                 | -11.4             |

RFU = relative fluorescence units, RFU1, RFU2 = relative fluorescence units from two independent uptake experiments

## Supplementary Table TS2

Mass spectrometry analyzed CPPs equipped with carboxyfluorescein (FAM) at the N-terminus

| Sequence length | Peptide sequence      | Theoretical mass (Da) | Detected mass (Da) |
|-----------------|-----------------------|-----------------------|--------------------|
| 5               | RRRRR                 | 1155.5793             | 1155.5778          |
| 5               | VP TLQ                | 913.3852              | 913.3853           |
| 7               | RRRRRRR               | 1467.7815             | 1467.7806          |
| 8               | RNRSRHRR              | 1493.7132             | 1493.7124          |
| 9               | RRRQRKKR              | 1695.9289             | 1695.9270          |
| 10              | GRKKRRQRRR            | 1752.9504             | 1752.9492          |
| 11              | GRKKRRQRRRC           | 1855.9595             | 1855.9563          |
| 11              | YGRKKRRQRRR           | 1916.0137             | 1916.0245          |
| 11              | YGRRARRAARR           | 1744.8765             | 1744.8745          |
| 11              | RRRQRKKRGY            | 1916.0137             | 1916.0250          |
| 12              | KRIPNKKPGKKT          | 1750.9513             | 1750.9485          |
| 12              | TRRSKRSSHRRKF         | 1971.0083             | 1971.0058          |
| 12              | LIIFRIAASHKK          | 1752.9346             | 1752.9327          |
| 12              | MIIFRILISHKK          | 1854.9849             | 1854.9824          |
| 13              | ALWKTLLKKVLKA         | 1868.0595             | 1868.0586          |
| 15              | QIKIWFQNRRMKWKK       | 2446.2515             | 2446.2480          |
| 15              | DSLKSYWYLQKFSWR       | 2363.0682             | 2363.0686          |
| 15              | KLWMRWYSATTRRYG       | 2331.0678             | 2331.0659          |
| 15              | CWKKKKKKKKKKKKK       | 2329.3967             | 2329.3947          |
| 16              | KLALKLALKALKAALK      | 2049.2385             | 2049.2371          |
| 16              | RQIKIWFQNRRMKWKK      | 2602.3527             | 2602.3521          |
| 16              | RAIKIWFQNRRMKWKK      | 2545.3312             | 2545.3286          |
| 16              | RQIKAWFQNRRMKWKK      | 2560.3057             | 2560.3035          |
| 16              | RQIKIWFANRRMKWKK      | 2545.3312             | 2545.3286          |
| 16              | RQIKIWFQARRMKWKK      | 2559.3468             | 2559.3440          |
| 16              | RQIKIWFQNRRRAKWKK     | 2542.3493             | 2542.3468          |
| 16              | RQIKIFFQNRRMKFKK      | 2524.3309             | 2524.3276          |
| 16              | KKWKMRRNQFWIKIQR      | 2602.3527             | 2602.3504          |
| 16              | RQIKIWFQNMRRKWKK      | 2602.3527             | 2602.3477          |
| 16              | YIVLRRRRKRVNTRKS      | 2457.3612             | 2457.3579          |
| 16              | KTVLLRKLKLLVVKI       | 2290.4288             | 2290.4287          |
| 16              | LLKKRKVVRLIKFLLK      | 2351.4604             | 2351.4594          |
| 16              | RLWRALPRVLRLLRP       | 2427.3911             | 2428.2939          |
| 16              | RQIKIWFQNRRMKWKK      | 2602.3526             | 2603.0069          |
| 17              | GKKTNLFSALIKKKKTA     | 2232.2301             | 2235.4192          |
| 17              | IAWVKAFIRKLRKGPLG     | 2309.2831             | 2310.3536          |
| 18              | KLALKLALKALKAALKLA    | 2233.3597             | 2233.3564          |
| 18              | KALAKALAKLWKALAKAA    | 2222.2610             | 2222.2593          |
| 18              | KLAAALLKKWKKLAAALL    | 2306.3549             | 2307.4468          |
| 18              | KLALKLALKALQAALQLA    | 2233.2869             | 2233.3118          |
| 18              | LGLLLRHLRHHSNLLANI    | 2446.3017             | 2446.3017          |
| 20              | ALWKTLLKKVLKAPKKRKY   | 2732.6616             | 2733.1622          |
| 20              | AYRIKPTFRRLKWKYKGFV   | 3028.6011             | 3027.8221          |
| 20              | GLWRALWRGLRSLWKKRKY   | 2893.6127             | 2893.6052          |
| 20              | WRFKAAVALLPAVLLALLAP  | 2489.3870             | 2489.3792          |
| 20              | CWKKKKKKKKKKKKKKK     | 2969.8716             | 2969.8678          |
| 21              | AGYLLGKINLKALAALAKKIL | 2538.4608             | 2538.4523          |

| <b>Sequence length</b> | <b>Peptide sequence</b>  | <b>Theoretical mass (Da)</b> | <b>Detected mass (Da)</b> |
|------------------------|--------------------------|------------------------------|---------------------------|
| 21                     | YTQDFNKFHTFPQTAIGVGAP    | 2695.2014                    | 2695.1903                 |
| 21                     | GLWRALWRALWRSLWKKKRKV    | 3093.7077                    | 3093.7045                 |
| 22                     | TKRRITPKKVIDVRSVTTEINT   | 2911.5550                    | 2911.5457                 |
| 23                     | MGLGLHLLVLAAALQGAKKKRKY  | 2771.5667                    | 2771.5738                 |
| 23                     | WLRRIKAWLRRIKALNRQLGVAA  | 3144.7721                    | 3144.7647                 |
| 23                     | MDAQTRRRERRAEKQAQQWKAAN  | 3184.5116                    | 3184.5024                 |
| 24                     | LNSAGYLLGKINLKALAALAKKIL | 2852.6199                    | 2852.6196                 |

**Supplementary Formula F1.** Calculation of net charge ( $Z$ ):

$$Z = \sum_i N_i \frac{10^{pka_i}}{10^{pH} + 10^{pka_i}} - \sum_j N_j \frac{10^{pH}}{10^{pH} + 10^{pka_j}}$$

$pka_i$  values: Lysine (K) = 10.5, Arginine (R) = 12.4, Histidine (H) = 6;  $pka_j$  values: Glutamic acid (E) = 4.25, Aspartic Acid (D) = 3.86, Cysteine (C) = 8.33, Tyrosine (Y) = 10.

$N_i$ : number of individual amino acids with  $pka_i$  values;  $N_j$ : number of individual amino acids with  $pka_j$  values

**Supplementary Formula F2.** Calculation of hydropathy score ( $H$ ):

$$H = \sum_i N_i H_i$$

$N_i$ : number of individual amino acids with respective hydrophilicity value  $H_i$

### Supplementary Table TS3

Amino acid residues with their respective hydrophilicity values for calculating peptide hydropathy scores.

| Amino acid        | Hydrophilicity value $H_i$ |
|-------------------|----------------------------|
| Arginine (R)      | 3.0                        |
| Aspartic acid (D) | 3.0                        |
| Glutamic acid (E) | 3.0                        |
| Lysine (K)        | 3.0                        |
| Serine (S)        | 0.3                        |
| Asparagine (R)    | 0.2                        |
| Glutamine (Q)     | 0.2                        |
| Glycine (G)       | 0.0                        |
| Proline (P)       | 0.0                        |
| Threonine (T)     | -0.4                       |
| Alanine (A)       | -0.5                       |
| Histidine (H)     | -0.5                       |
| Cysteine (C)      | -1.0                       |
| Methionine (M)    | -1.3                       |
| Valine (V)        | -1.5                       |
| Isoleucine (I)    | -1.8                       |
| Leucine (L)       | -1.8                       |
| Tyrosine (T)      | -2.3                       |
| Phenylalanine (F) | -2.5                       |
| Tryptophan (W)    | -3.4                       |

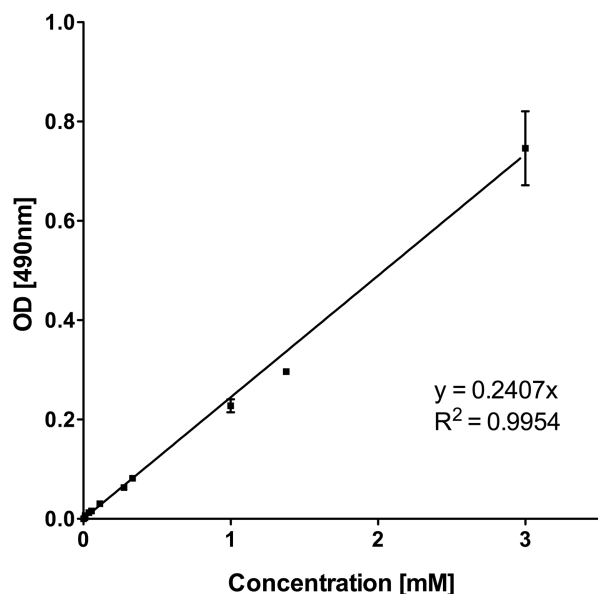

**Supplementary Fig. S1.** Calibration curve of carboxyfluorescein (FAM) at pH 2.4 for concentration calculation. Measurements were repeated up to three times. (OD: optical density)

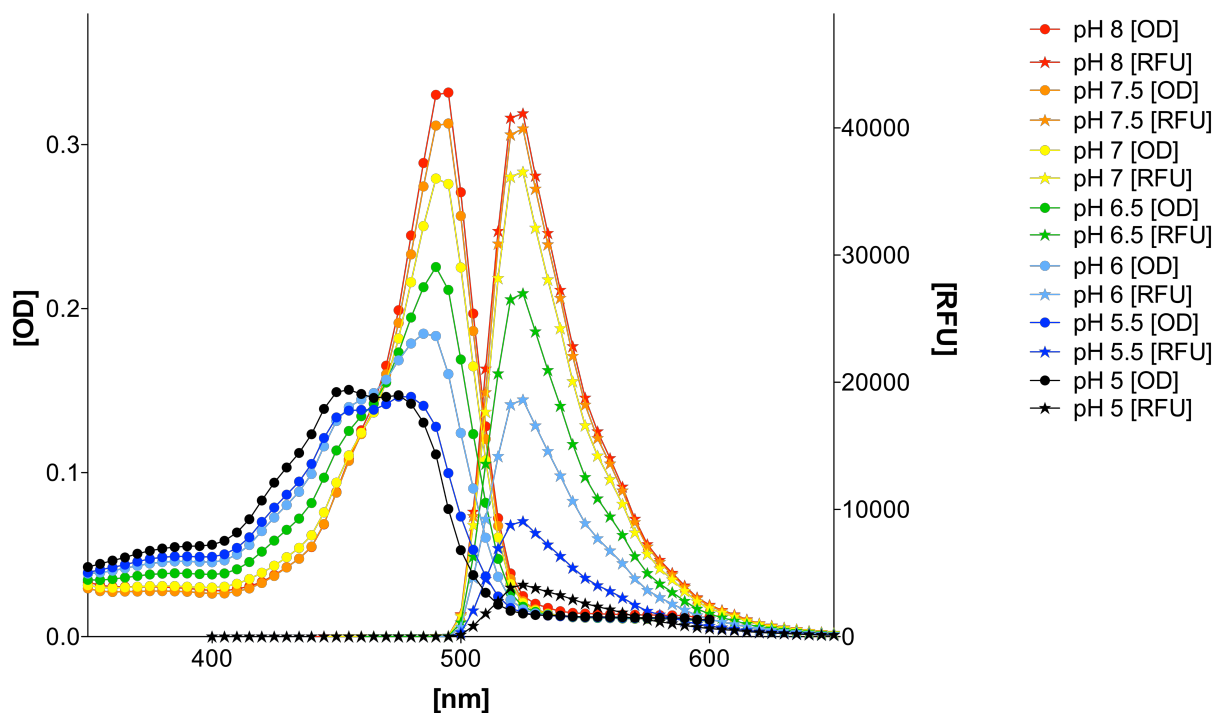

**Supplementary Fig. S2.** Carboxyfluorescein (FAM) absorbance and fluorescence at different pH values. FAM was dissolved in PBS buffer, pH was adjusted to 8, 7.5, 7, 6.5, 6, 5.5 and 5 respectively. The absorbance spectra ([OD]) of the different solutions were recorded between 350 nm and 600 nm, fluorescence intensities ([RFU], excitation wavelength 495 nm) were measured between 400 nm and 650 nm. The isosbestic point is at 460 nm.
